# Supplementary material for: Social overtures in Corydoradinae catfish mitigate the effects of acute stress
Source: Research Square preprint supplement (doi:10.21203/rs.3.rs-7217527/v1), 2025-08-12
Supplement: Supplementary file 1 [file c3685f30e9fca5ebb0065a77.xlsx]

## Sheet: Sheet1
date	sex	date formate	test tank	Group ID	scorer	Fish Number	Combined ID	front nudges first	back nudges first	mutuals first	time to first nudge	front nudges second	back nudges second	mutuals second	wall surfing first	wall surfing second	activity first nudging period	activity second nudging period	second period activity check	nudge period same as first five minutes?	nudge period same as second five minutes?	feed time	freeze time	interval 1	interval 2	interval 3	interval 4	fish length (cm)
2024-05-13	Female	513	1	5131	MU/RJR	1	5131F1	3	1	0	94	9	1	2	0	62	36	82	20	no	yes	2280	623	42	34	31	20	5.33
2024-05-13	Male	513	2	5132	EL	1	5132F1	3	2	0	89	53	8	7	20	235	260	300	65	yes	yes	202	118	34	20	na	NA	5.49
2024-05-14	Male	514	1	5141	RJR	1	5141F1	1	1	1	204	11	6	2	12	66	110	147	81	yes	yes	1838	441	42	28	18	18	5.11
2024-05-14	Female	514	2	5142	EL	1	5142F1	6	3	0	49	79	9	0	74	108	243	254	146	yes	yes	913	773	38	27	19	18	6.58
2024-05-15	Male	515	1	5151	EL	1	5151F1	0	0	0	NA	0	0	0	0	0	154	0	0	NA	NA	1092	103	57	41	20	14	5.33
2024-05-15	Male	515	2	5152	RJR	1	5152F1	0	1	0	79	0	0	0	0	0	20	82	82	yes	yes	2855	1986	48	30	26	28	4.39
2024-05-16	Female	516	1	5161	EL	1	5161F1	4	2	1	90	0	0	0	8	0	107	0	0	yes	yes	959	29	52	23	25	30	5.72
2024-05-16	Male	516	2	5162	MU/RJR	1	5162F1	4	3	3	20	3	0	0	0	0	7	15	15	no	yes	412	323	47	25	NA	18	4.85
2024-05-17	Male	517	1	5171	EL	1	5171F1	2	3	0	218	25	5	0	3	284	37	297	13	yes	yes	665	652	49	32	NA	20	3.94
2024-05-17	Female	517	2	5172	MU	1	5172F1	8	5	3	188	38	0	20	50	146	90	270	124	yes	yes	761	11	59	28	30	28	5.26
2024-05-18	Female	518	1	5181	MS	1	5181F1	0	0	0	NA	81	3	17	0	247	26	282	35	yes	yes	1203	657	41	NA	NA	33	5.87
2024-05-18	Male	518	2	5182	EL	1	5182F1	4	3	2	173	3	3	2	97	263	147	293	30	no	yes	667	239	62	NA	NA	28	4.17
2024-05-30	Male	530	1	5301	EL	1	5301F1	9	0	0	144	23	1	2	55	213	147	300	87	yes	yes	378	265	29	NA	NA	26	4.98
2024-05-30	Female	530	2	5302	MS	1	5302F1	8	0	0	264	24	3	6	153	246	238	300	54	no	yes	361	70	43	38	NA	28	5.18
2024-05-31	Female	531	1	5311	EL	1	5311F1	0	0	0	NA	28	13	7	0	217	0	290	73	yes	yes	435	224	49	36	29	23	6.99
2024-05-31	Male	531	2	5312	MS	1	5312F1	7	0	0	211	27	0	16	23	131	70	226	95	yes	yes	255	223	48	25	30	24	4.39
2024-06-03	Female	63	1	631	EL	1	631F1	0	0	0	NA	6	1	0	0	12	0	41	29	yes	yes	2200	1523	57	59	35	36	5.29
2024-06-03	Male	63	2	632	MS	1	632F1	7	0	0	227	6	3	2	42	36	85	233	197	yes	yes	585	168	47	NA	NA	20	4.83
2024-06-04	Female	64	1	641	MS	1	641F1	2	1	0	180	85	4	10	0	169	48	178	9	yes	yes	2693	1350	30	27	17	21	5.41
2024-06-04	Female	64	2	642	MS	1	642F1	0	0	0	NA	52	3	20	0	186	0	223	37	yes	yes	465	290	51	31	27	14	4.85
2024-05-13	Female	513	1	5131	MU/RJR	2	5131F2	1	0	0	94	5	1	2	0	72	6	105	33	no	yes	2277	618	37	45	21	33	5.26
2024-05-13	Male	513	2	5132	EL	2	5132F2	2	0	0	89	27	8	7	10	247	182	300	53	yes	yes	170	18	30	20	na	NA	4.06
2024-05-14	Male	514	1	5141	RJR	2	5141F2	22	4	1	204	29	3	2	10	49	265	126	77	yes	yes	1611	23	46	30	18	14	4.34
2024-05-14	Female	514	2	5142	EL	2	5142F2	18	7	0	49	25	1	0	70	26	168	210	184	yes	yes	887	777	49	23	21	17	5.38
2024-05-15	Male	515	1	5151	EL	2	5151F2	0	0	0	NA	0	0	0	0	0	0	0	0	NA	NA	1038	1013	55	32	NA	30	4.52
2024-05-15	Male	515	2	5152	RJR	2	5152F2	3	0	0	79	0	0	0	0	0	53	79	79	yes	yes	3018	2495	41	29	21	22	3.91
2024-05-16	Female	516	1	5161	EL	2	5161F2	17	3	1	90	0	0	0	20	0	155	0	0	yes	yes	962	27	50	23	23	40	4.57
2024-05-16	Male	516	2	5162	MU/RJR	2	5162F2	1	4	3	20	0	1	0	0	0	38	3	3	no	yes	1342	1082	44	23	NA	19	4.32
2024-05-17	Male	517	1	5171	EL	2	5171F2	4	0	0	218	14	2	0	154	251	155	300	49	yes	yes	671	315	63	NA	NA	35	3.73
2024-05-17	Female	517	2	5172	MU	2	5172F2	5	1	3	188	62	1	20	66	119	86	270	151	yes	yes	143	14	56	28	30	39	4.88
2024-05-18	Female	518	1	5181	MS	2	5181F2	0	0	0	NA	101	2	17	0	246	0	282	36	yes	yes	1213	508	30	NA	NA	32	5.15
2024-05-18	Male	518	2	5182	EL	2	5182F2	11	0	2	173	31	0	2	0	172	138	300	128	no	yes	660	232	34	NA	NA	39	3.1
2024-05-30	Male	530	1	5301	EL	2	5301F2	2	0	0	144	0	1	2	41	124	146	300	176	yes	yes	388	82	44	NA	NA	18	3.68
2024-05-30	Female	530	2	5302	MS	2	5302F2	2	2	0	264	20	2	6	23	238	256	300	62	no	yes	424	63	42	NA	NA	18	4.34
2024-05-31	Female	531	1	5311	EL	2	5311F2	0	0	0	NA	33	4	7	0	258	5	300	42	yes	yes	435	227	35	29	24	NA	5.51
2024-05-31	Male	531	2	5312	MS	2	5312F2	5	0	0	211	0	1	16	0	120	90	235	115	yes	yes	72	25	41	22	NA	20	4.19
2024-06-03	Female	63	1	631	EL	2	631F2	0	0	0	NA	32	1	0	0	8	0	55	47	yes	yes	2205	235	51	38	28	28	4.04
2024-06-03	Male	63	2	632	MS	2	632F2	0	2	0	227	6	3	2	56	128	61	246	118	yes	yes	585	162	40	NA	NA	27	4.34
2024-06-04	Female	64	1	641	MS	2	641F2	0	1	0	180	18	4	10	0	202	192	214	12	yes	yes	2970	1335	38	22	15	24	4.32
2024-06-04	Female	64	2	642	MS	2	642F2	0	0	0	NA	52	2	20	0	154	0	226	72	yes	yes	368	102	42	31	23	20	4.22
